# Supplementary material for: Spontaneous resolution of chiral bis-sulfoxides with asymmetric atropisomerism
Source: Royal Society of Chemistry journal article supplement (doi:10.1039/c4ce00296b), 2014-01-01
Supplement: c4ce00296b1.pdf [file c4ce00296b1.pdf]

# Spontaneous resolution of chiral bis-sulfoxides with asymmetric atropisomerism

Zhiguang Xu,\* Haiyang Liu,\* Mian HR Mahmood, Yuepeng Cai, Xuan Xu and Youwen Tang

## Supporting Information

### Contents

|                            |   |
|----------------------------|---|
| 1. Experimental:.....      | 1 |
| 2. Crystallography:.....   | 3 |
| 3. ORTEP of 1s and 3s..... | 5 |
| 4. Spectrum of 1-3s.....   | 6 |

### 1. Experimental:

Preparation of  $\alpha,\alpha'$ -di-*tert*-butylthio-*p*-xylene (**1s**) and  $\alpha,\alpha'$ -di-*tert*-butylsulfinyl-*p*-xylene (**1**):

Sodium hydroxide (99%, 2.218 g, 0.055 mol) and *tert*-butyl mercaptan (5.000 g, 0.055 mol) were dissolved in anhydrous ethanol (50 ml) at 70°C before  $\alpha,\alpha'$ -dichloro-*p*-xylene (4.85 g, 0.027 mol) was added to the above solution, then stirred for 1 h. The solution was extracted with dichloromethane after the addition of 400 ml of water. Evaporating the dichloromethane gave **1s** (6.871 g, 0.024 mol) with a yield of 87%. Hydrogen peroxide (30%, 2.89 ml, 0.028 mol) was added dropwise to a solution of  $\alpha,\alpha'$ -di-*tert*-butylthio-*p*-xylene (4.000 g, 0.014 mol) in acetic acid (60 ml) on an ice bath and the solution vigorously stirred for 1 h, then 500 ml of water added. The solution was extracted with dichloromethane, and the product of **1** (3.912 g, 0.012 mol) was obtained after evaporation of CH<sub>2</sub>Cl<sub>2</sub> with a yield of 85% and total yield of 74%. The crude product was purified by simple recrystallization from mixtures of *n*-hexane and dichloromethane.

White crystals of the bis-sulfoxides **1** were obtained by slow evaporation of a mixed solution including *n*-hexane and dichloromethane.

Separation of diastereomers *rac*-**1** and *meso*-**1**:

The crystallization of **1** including *rac*-**1** and *meso*-**1** gave two types of crystals, one spiculate shaped and the other block shaped (Figure S1). The spiculate crystal and the block crystal are confirmed as *rac*-**1** and *meso*-**1** by X-ray analysis, respectively. It is easy to separate diastereomers *rac*-**1** and *meso*-**1** by picking out the spiculate crystal or the block crystal from mixed diastereomers crystals by eye or microscope.

The procedure for the preparation of **2** and **3** was the same as for compound **1**. Crystal preparation and separation of diastereomers for **2** and **3** was also the same as for **1**, which gave two types of crystals, one spiculate shaped (*rac*-**2**, *rac*-**3**) and the other block shaped (*meso*-**2**, *meso*-**3**) (see Figure S2 and S3).

By the means of NMR (see Figure S39-S41) approximate diastereomer ratios (*racemate* vs *meso*) for compounds **1**, **2** and **3** are 1:1.09, 1:1.21 and 1:1.24, respectively.

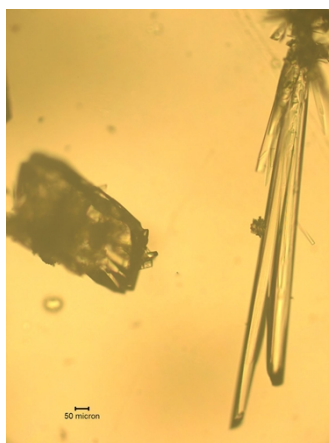

**Figure S1.** Block shape crystals of *meso-1* (left) and spiculate shape crystals of *rac-1* (right)

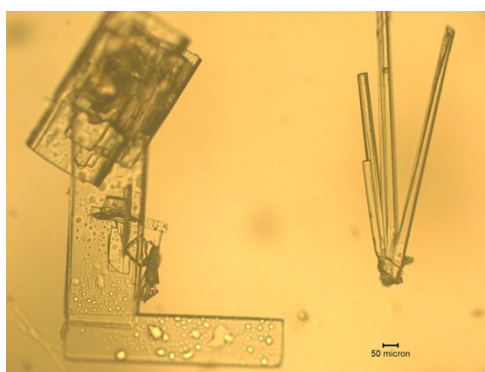

**Figure S2.** Block shape crystals of *meso-2* (left) and spiculate shape crystals of *rac-2* (right)

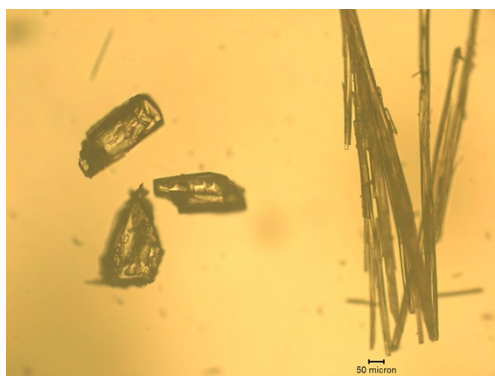

**Figure S3.** Block shape crystals of *meso-3* (left) and spiculate shape crystals of *rac-3* (right)

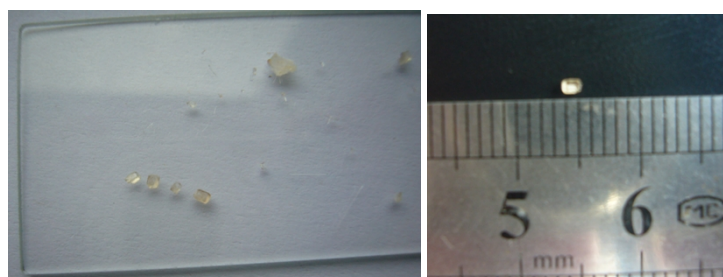

**Figure S4.** Block shape crystals of *meso-3*

$\alpha,\alpha'$ -di-*tert*-butylthio-*p*-xylene, **1s**:

$^1\text{H}$  NMR (400 MHz,  $\text{CDCl}_3$ )  $\delta$ : 7.268 (s, 4H,  $\text{C}_{\text{AR}}\text{H}$ ), 3.736 (s, 4H,  $\text{CH}_2$ ), 1.340 (s, 18H,  $\text{CH}_3$ ),  $^{13}\text{C}$  NMR  $\delta$ : 137.041( $\text{C}_{\text{AR}}-\text{CH}_2$ ), 129.044( $\text{C}_{\text{AR}}^1-\text{C}_{\text{AR}}^2-\text{CH}_2$ ), 42.842( $\text{CCH}_3$ ), 33.100( $\text{CH}_2$ ), 30.924( $\text{CH}_3$ ). MS:  $m/z$ : 282.12(19%). IR(KBr,  $\text{cm}^{-1}$ )  $\nu$ : 3022.60, 2954.52, 1157.43.

(**R,S**)- $\alpha,\alpha'$ -di-*tert*-butylsulfinyl-*p*-xylene, *meso*-1:

$^1\text{H}$  NMR (400 MHz,  $\text{CDCl}_3$ )  $\delta$ : 7.347 (s, 4H,  $\text{C}_{\text{AR}}\text{H}$ ), 3.819 (d, 2H,  $J=13\text{Hz}$ ,  $\text{CH}_2$ ), 3.624 (d, 2H,  $J=13\text{Hz}$ ,  $\text{CH}_2$ ), 1.328 (s, 18H,  $\text{CH}_3$ ),  $^{13}\text{C}$  NMR  $\delta$ : 131.838, 130.516, 53.790, 52.507, 23.062. MS:  $m/z$ : 315.2(100%). IR(KBr,  $\text{cm}^{-1}$ )  $\nu$ : 3024.20, 2923.45, 1032.35, 842.44, 673.10.

(**R,R**)/(**S,S**)- $\alpha,\alpha'$ -di-*tert*-butylsulfinyl-*p*-xylene, *rac*-1:

$^1\text{H}$  NMR (400 MHz,  $\text{CDCl}_3$ )  $\delta$ : 7.347 (s, 4H,  $\text{C}_{\text{AR}}\text{H}$ ), 3.824 (d, 2H,  $J=13\text{Hz}$ ,  $\text{CH}_2$ ), 3.622 (d, 2H,  $J=13\text{Hz}$ ,  $\text{CH}_2$ ), 1.328 (s, 18H,  $\text{CH}_3$ ),  $^{13}\text{C}$  NMR  $\delta$ : 131.843, 130.503, 53.778, 52.505, 23.048. MS:  $m/z$ : 315.2(100%). IR(KBr,  $\text{cm}^{-1}$ )  $\nu$ : 3024.20, 2923.58, 1031.72, 844.36, 672.24.

(**R,R**)/(**S,S**)- $\alpha,\alpha'$ -di-*tert*-butylsulfinyl-*m*-xylene, *rac*-2:

$^1\text{H}$  NMR (400 MHz,  $\text{CDCl}_3$ )  $\delta$ : 7.347-7.304 (m, 4H,  $\text{C}_{\text{AR}}\text{H}$ ), 3.813 (d, 2H,  $J=13\text{Hz}$ ,  $\text{CH}_2$ ), 3.641 (d, 2H,  $J=13\text{Hz}$ ,  $\text{CH}_2$ ), 1.328 (s, 18H,  $\text{CH}_3$ )?,  $^{13}\text{C}$  NMR (400 MHz,  $\text{CDCl}_3$ )  $\delta$ : 132.188, 131.994, 129.693, 129.397, 53.864, 52.561, 23.122. MS:  $m/z$ : 315.2(100%). IR(KBr,  $\text{cm}^{-1}$ )  $\nu$ : 3037.71, 2968.86, 1042.97, 816.21, 708.97.

(**R,S**)- $\alpha,\alpha'$ -di-*tert*-butylsulfinyl-*m*-xylene, *meso*-2:

$^1\text{H}$  NMR (400 MHz,  $\text{CDCl}_3$ )  $\delta$ : 7.383-7.297(m, 4H,  $\text{C}_{\text{AR}}\text{H}$ ), 3.832 (d, 2H,  $J=13\text{Hz}$ ,  $\text{CH}_2$ ), 3.611 (d, 2H,  $J=13\text{Hz}$ ,  $\text{CH}_2$ ), 1.330 (s, 18H,  $\text{CH}_3$ ),  $^{13}\text{C}$  NMR  $\delta$ : 132.705, 131.593, 129.873, 129.409, 53.806, 52.579, 23.080. MS:  $m/z$ : 315.2(87.9%). IR(KBr,  $\text{cm}^{-1}$ )  $\nu$ : 3049.28, 2970.73, 1036.07, 811.80, 707.09.

$\alpha,\alpha'$ -di-*tert*-butylthio-*o*-xylene, **3s**:

$^1\text{H}$  NMR (400 MHz,  $\text{CDCl}_3$ )  $\delta$ : 7.338-7.192 (4H,  $\text{C}_{\text{AR}}\text{H}$ ), 3.948 (s, 4H,  $\text{CH}_2$ ), 1.444 (s, 18H,  $\text{CH}_3$ ),  $^{13}\text{C}$  NMR  $\delta$ : 136.271, 130.738, 127.492, 42.982, 30.876, 30.588. MS:  $m/z$ : 283.3(14%). IR(KBr,  $\text{cm}^{-1}$ )  $\nu$ : 3019.17, 2957.93, 1162.62, 776.51.

(**R,R**)/(**S,S**)- $\alpha,\alpha'$ -di-*tert*-butylsulfinyl-*o*-xylene, *rac*-3:

$^1\text{H}$  NMR (400 MHz,  $\text{CDCl}_3$ )  $\delta$ : 7.339 (4H,  $\text{C}_{\text{AR}}\text{H}$ ), 4.675 (d, 2H,  $J=13\text{Hz}$ ,  $\text{CH}_2$ ), 3.605 (d, 2H,  $J=13\text{Hz}$ ,  $\text{CH}_2$ ), 1.389(s, 18H,  $\text{CH}_3$ ),  $^{13}\text{C}$  NMR  $\delta$ : 133.26, 131.69, 128.48, 53.91, 48.94, 23.02. MS:  $m/z$ : 315.2(58%). IR(KBr,  $\text{cm}^{-1}$ )  $\nu$ : 3028.06, 2954.55, 1024.71, 898.81, 764.42.

(**M,R,S**/**P,R,S**)- $\alpha,\alpha'$ -di-*tert*-butylsulfinyl-*o*-xylene, (**M,R,S**)-7/(**P,R,S**)-3:

$^1\text{H}$  NMR (400 MHz,  $\text{CDCl}_3$ )  $\delta$ : 7.365-7.315 (4H,  $\text{C}_{\text{AR}}\text{H}$ ), 4.284 (d, 2H,  $J=13\text{Hz}$ ,  $\text{CH}_2$ ), 3.769 (d, 2H,  $J=13\text{Hz}$ ,  $\text{CH}_2$ ), 1.386 (s, 18H,  $\text{CH}_3$ ),  $^{13}\text{C}$  NMR  $\delta$ : 132.406, 132.083, 128.746, 54.097, 50.216, 23.019. MS:  $m/z$ : 315.2(100%). IR(KBr,  $\text{cm}^{-1}$ )  $\nu$ : 3026.13, 2925.42, 1028.87, 922.22, 768.47.

## 2. Crystallography:

Crystal data for **1s**:  $\text{C}_{16}\text{H}_{26}\text{S}_2$ ,  $M = 282.51$ , triclinic,  $a = 6.171(5) \text{ \AA}$ ,  $b = 12.078(5) \text{ \AA}$ ,  $c = 12.267(5) \text{ \AA}$ ,  $\alpha = 76.243(5)^\circ$ ,  $\beta = 80.572(5)^\circ$ ,  $\gamma = 77.970(5)^\circ$ ,  $V = 862.3(9) \text{ \AA}^3$ ,  $T = 293(2) \text{ K}$ , space group **PError!**,  $Z = 2$ , 5111 reflections measured, 3686 independent reflections ( $R_{\text{int}} = 0.0127$ ). The final  $R_1$  values were 0.0732 ( $I > 2\sigma(I)$ ). The final  $wR(F^2)$  values were 0.2064 ( $I > 2\sigma(I)$ ). The final  $R_1$  values were 0.1041 (all data). The final  $wR(F^2)$  values were 0.2324 (all data). The goodness of fit on  $F^2$  was 1.086. The asymmetric unit has two half molecules, each lying about independent inversion centers.

Crystal data for *rac*-1:  $\text{C}_{16}\text{H}_{26}\text{O}_2\text{S}_2$ ,  $M = 314.51$ , monoclinic,  $a = 5.985(4) \text{ \AA}$ ,  $b = 10.346(7) \text{ \AA}$ ,  $c = 27.985(18) \text{ \AA}$ ,  $\alpha =$

90.00°,  $\beta = 90.592(9)^\circ$ ,  $\gamma = 90.00^\circ$ ,  $V = 1733(2) \text{ \AA}^3$ ,  $T = 293(2) \text{ K}$ , space group  $P21/c$ ,  $Z = 4$ ,  $\mu(\text{MoK}\alpha) = 0.307 \text{ mm}^{-1}$ , 9885 reflections measured, 3899 independent reflections ( $R_{int} = 0.0632$ ). The final  $R_1$  values were 0.1103 ( $I > 2\sigma(I)$ ). The final  $wR(F^2)$  values were 0.2965 ( $I > 2\sigma(I)$ ). The final  $R_1$  values were 0.1749 (all data). The final  $wR(F^2)$  values were 0.3307 (all data). The goodness of fit on  $F^2$  was 1.025.

Crystal data for *meso-1*:  $\text{C}_{16}\text{H}_{26}\text{O}_2\text{S}_2$ ,  $M = 314.51$ , triclinic,  $a = 5.927(5) \text{ \AA}$ ,  $b = 6.623(5) \text{ \AA}$ ,  $c = 11.219(5) \text{ \AA}$ ,  $\alpha = 80.046(5)^\circ$ ,  $\beta = 89.205(5)^\circ$ ,  $\gamma = 84.973(5)^\circ$ ,  $V = 432.1(5) \text{ \AA}^3$ ,  $T = 293(2) \text{ K}$ , space group **PError!**,  $Z = 1$ ,  $\mu(\text{MoK}\alpha) = 0.308 \text{ mm}^{-1}$ , 2589 reflections measured, 1861 independent reflections ( $R_{int} = 0.0109$ ). The final  $R_1$  values were 0.0562 ( $I > 2\sigma(I)$ ). The final  $wR(F^2)$  values were 0.1662 ( $I > 2\sigma(I)$ ). The final  $R_1$  values were 0.0638 (all data). The final  $wR(F^2)$  values were 0.1758 (all data). The goodness of fit on  $F^2$  was 1.034. The molecule lies about an inversion centre.

Crystal data for *rac-2*:  $\text{C}_{16}\text{H}_{26}\text{O}_2\text{S}_2$ ,  $M = 314.51$ , triclinic,  $a = 6.3438(18) \text{ \AA}$ ,  $b = 10.203(3) \text{ \AA}$ ,  $c = 14.767(4) \text{ \AA}$ ,  $\alpha = 108.771(4)^\circ$ ,  $\beta = 97.042(4)^\circ$ ,  $\gamma = 93.170(4)^\circ$ ,  $V = 893.6(4) \text{ \AA}^3$ ,  $T = 293(2) \text{ K}$ , space group **PError!**,  $Z = 2$ ,  $\mu(\text{MoK}\alpha) = 0.297 \text{ mm}^{-1}$ , 5444 reflections measured, 3920 independent reflections ( $R_{int} = 0.0223$ ). The final  $R_1$  values were 0.0576 ( $I > 2\sigma(I)$ ). The final  $wR(F^2)$  values were 0.1395 ( $I > 2\sigma(I)$ ). The final  $R_1$  values were 0.1101 (all data). The final  $wR(F^2)$  values were 0.1667 (all data). The goodness of fit on  $F^2$  was 1.043.

Crystal data for *meso-2*:  $\text{C}_{16}\text{H}_{26}\text{O}_2\text{S}_2$ ,  $M = 314.51$ , monoclinic,  $a = 12.418(5) \text{ \AA}$ ,  $b = 6.541(2) \text{ \AA}$ ,  $c = 21.609(8) \text{ \AA}$ ,  $\alpha = 90.00^\circ$ ,  $\beta = 93.212(6)^\circ$ ,  $\gamma = 90.00^\circ$ ,  $V = 1752.5(11) \text{ \AA}^3$ ,  $T = 293(2) \text{ K}$ , space group  $P21/c$ ,  $Z = 4$ ,  $\mu(\text{MoK}\alpha) = 0.303 \text{ mm}^{-1}$ , 10160 reflections measured, 4061 independent reflections ( $R_{int} = 0.0729$ ). The final  $R_1$  values were 0.0841 ( $I > 2\sigma(I)$ ). The final  $wR(F^2)$  values were 0.2220 ( $I > 2\sigma(I)$ ). The final  $R_1$  values were 0.1968 (all data). The final  $wR(F^2)$  values were 0.2771 (all data). The goodness of fit on  $F^2$  was 0.963.

Crystal data for *cis-2* (with disorder of sulfinyl):  $\text{C}_{16}\text{H}_{26}\text{O}_2\text{S}_2$ ,  $M = 314.49$ , monoclinic,  $a = 12.443(2) \text{ \AA}$ ,  $b = 6.5577(11) \text{ \AA}$ ,  $c = 21.666(3) \text{ \AA}$ ,  $\alpha = 90.00^\circ$ ,  $\beta = 93.151(2)^\circ$ ,  $\gamma = 90.00^\circ$ ,  $V = 1765.2(5) \text{ \AA}^3$ ,  $T = 293(2) \text{ K}$ , space group  $P21/c$ ,  $Z = 4$ ,  $\mu(\text{MoK}\alpha) = 0.301 \text{ mm}^{-1}$ , 8800 reflections measured, 3261 independent reflections ( $R_{int} = 0.0281$ ). The final  $R_1$  values were 0.0573 ( $I > 2\sigma(I)$ ). The final  $wR(F^2)$  values were 0.1502 ( $I > 2\sigma(I)$ ). The final  $R_1$  values were 0.0813 (all data). The final  $wR(F^2)$  values were 0.1645 (all data). The goodness of fit on  $F^2$  was 1.062.

Crystal data for *rac-3*:  $\text{C}_{16}\text{H}_{26}\text{O}_2\text{S}_2$ ,  $M = 314.51$ , monoclinic,  $a = 11.940(7) \text{ \AA}$ ,  $b = 19.051(10) \text{ \AA}$ ,  $c = 9.493(5) \text{ \AA}$ ,  $\alpha = 90.00^\circ$ ,  $\beta = 124.504(7)^\circ$ ,  $\gamma = 90.00^\circ$ ,  $V = 1779.5(17) \text{ \AA}^3$ ,  $T = 293(2) \text{ K}$ , space group  $C2/c$ ,  $Z = 4$ ,  $\mu(\text{MoK}\alpha) = 0.299 \text{ mm}^{-1}$ , 5309 reflections measured, 2060 independent reflections ( $R_{int} = 0.0843$ ). The final  $R_1$  values were 0.0586 ( $I > 2\sigma(I)$ ). The final  $wR(F^2)$  values were 0.1071 ( $I > 2\sigma(I)$ ). The final  $R_1$  values were 0.1811 (all data). The final  $wR(F^2)$  values were 0.1419 (all data). The goodness of fit on  $F^2$  was 0.926. The molecule lies about a twofold axis.

Crystal data for (**P**, **R**, **S**)-**3**:  $\text{C}_{16}\text{H}_{26}\text{O}_2\text{S}_2$ ,  $M = 314.51$ , orthorhombic,  $a = 10.4014(17) \text{ \AA}$ ,  $b = 11.1506(18) \text{ \AA}$ ,  $c = 15.433(3) \text{ \AA}$ ,  $\alpha = 90.00^\circ$ ,  $\beta = 90.00^\circ$ ,  $\gamma = 90.00^\circ$ ,  $V = 1790.0(5) \text{ \AA}^3$ ,  $T = 293(2) \text{ K}$ , space group  $P212121$ ,  $Z = 4$ ,  $\mu(\text{MoK}\alpha) = 0.297 \text{ mm}^{-1}$ , 10956 reflections measured, 4144 independent reflections ( $R_{int} = 0.0731$ ). The final  $R_1$  values were 0.0547 ( $I > 2\sigma(I)$ ). The final  $wR(F^2)$  values were 0.0585 ( $I > 2\sigma(I)$ ). The final  $R_1$  values were 0.1443 (all data). The final  $wR(F^2)$  values were 0.0721 (all data). The goodness of fit on  $F^2$  was 1.041. Flack parameter = 0.20(8).

Crystal data for (**M**, **R**, **S**)-**3**:  $\text{C}_{16}\text{H}_{26}\text{O}_2\text{S}_2$ ,  $M = 314.51$ , orthorhombic,  $a = 10.4267(16) \text{ \AA}$ ,  $b = 15.449(2) \text{ \AA}$ ,  $c = 11.1546(18) \text{ \AA}$ ,  $\alpha = 90.00^\circ$ ,  $\beta = 90.00^\circ$ ,  $\gamma = 90.00^\circ$ ,  $V = 1796.8(5) \text{ \AA}^3$ ,  $T = 293(2) \text{ K}$ , space group  $P212121$ ,  $Z = 4$ ,  $\mu(\text{MoK}\alpha) = 0.296 \text{ mm}^{-1}$ , 10429 reflections measured, 4144 independent reflections ( $R_{int} = 0.1054$ ). The final  $R_1$  values were 0.0945 ( $I > 2\sigma(I)$ ). The final  $wR(F^2)$  values were 0.0813 ( $I > 2\sigma(I)$ ). The final  $R_1$  values were 0.2124 (all data). The final  $wR(F^2)$  values were 0.1018 (all data). The goodness of fit on  $F^2$  was 1.003. Flack parameter = 0.11(11).

Crystal data for **3s**:  $\text{C}_{16}\text{H}_{26}\text{S}_2$ ,  $M = 282.51$ , triclinic,  $a = 8.2584(14) \text{ \AA}$ ,  $b = 10.6118(18) \text{ \AA}$ ,  $c = 11.751(2) \text{ \AA}$ ,  $\alpha = 67.631(2)^\circ$ ,  $\beta = 72.609(2)^\circ$ ,  $\gamma = 69.331(2)^\circ$ ,  $V = 874.8(3) \text{ \AA}^3$ ,  $T = 293(2) \text{ K}$ , space group **PError!**,  $Z = 2$ ,  $\mu(\text{MoK}\alpha) = 0.289 \text{ mm}^{-1}$ , 5122 reflections measured, 3723 independent reflections ( $R_{int} = 0.0148$ ). The final  $R_1$  values were 0.0453 ( $I > 2\sigma(I)$ ). The final  $wR(F^2)$  values were 0.1133 ( $I > 2\sigma(I)$ ). The final  $R_1$  values were 0.0745 (all data). The

final  $wR(F^2)$  values were 0.1319 (all data). The goodness of fit on  $F^2$  was 1.009.

### 3. ORTEP of 1s and 3s

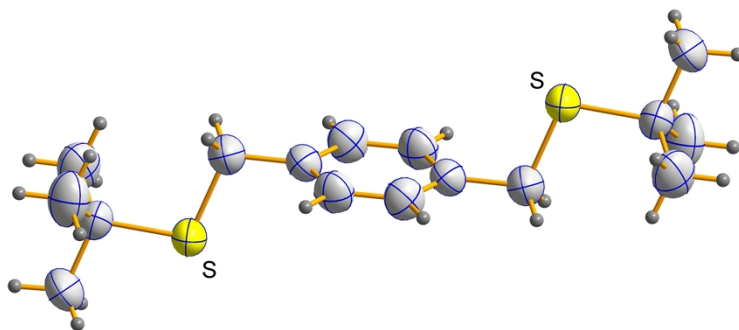

Figure S5. ORTEP of 1s with thermal ellipsoids drawn at the 50% probability level.

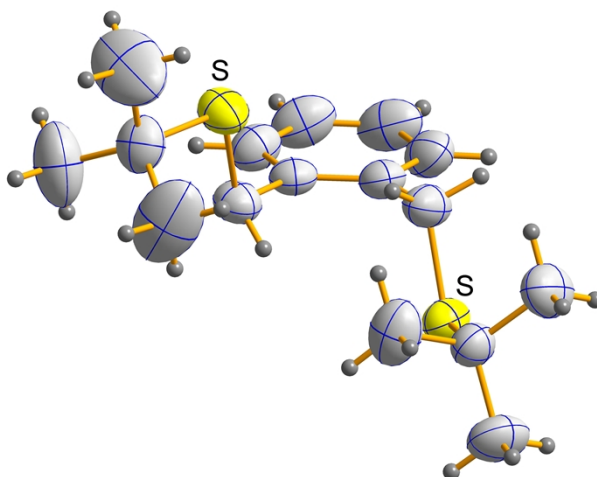

Figure S6. ORTEP of 3s with thermal ellipsoids drawn at the 50% probability level.

## 4. Spectrum of 1-3s

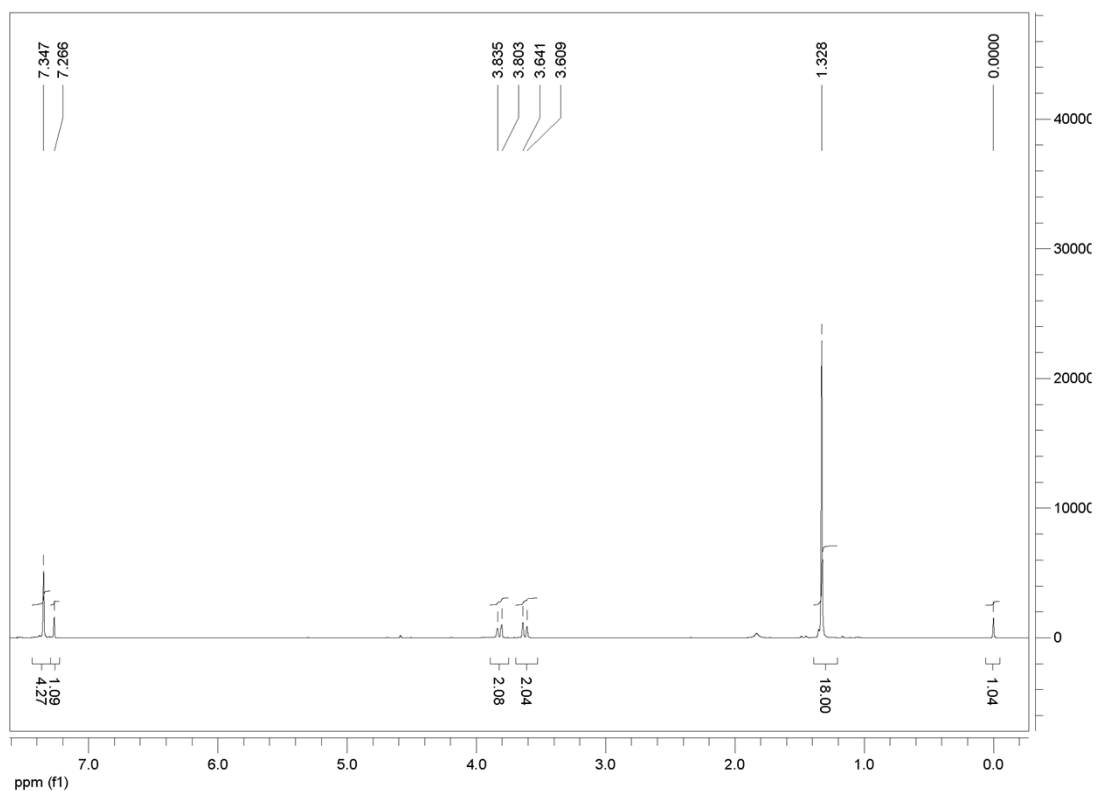

Figure S7. <sup>1</sup>H NMR spectrum of *rac-1*

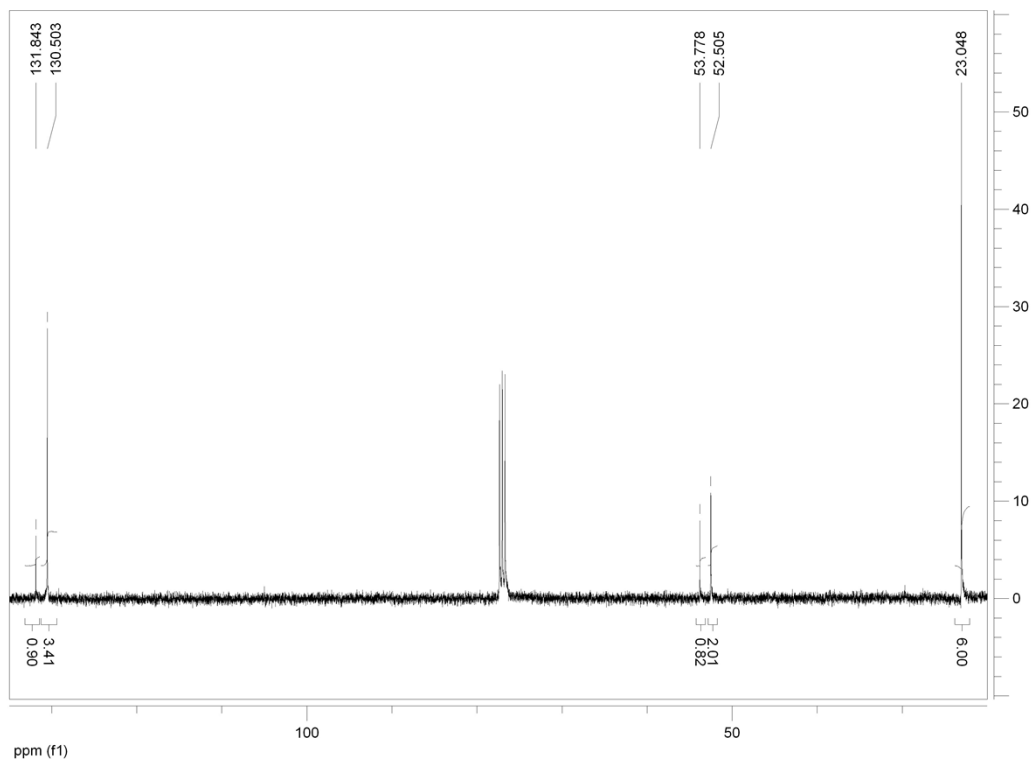

Figure S8. <sup>13</sup>C NMR spectrum of *rac-1*

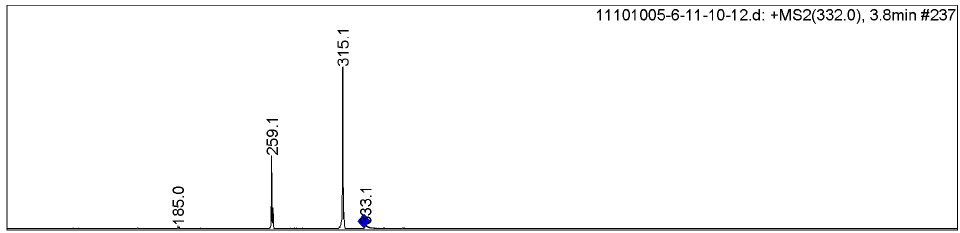

| #  | m/z   | I       | I%    |
|----|-------|---------|-------|
| 1  | 185.0 | 108746  | 1.5   |
| 2  | 259.1 | 3324166 | 44.9  |
| 3  | 260.1 | 936272  | 12.7  |
| 4  | 312.5 | 64191   | 0.9   |
| 5  | 315.1 | 7398854 | 100.0 |
| 6  | 316.0 | 730276  | 9.9   |
| 7  | 333.1 | 149959  | 2.0   |
| 8  | 334.1 | 105991  | 1.4   |
| 9  | 334.7 | 87398   | 1.2   |
| 10 | 336.0 | 62645   | 0.8   |

Figure S9. MS spectrum of *rac-1*

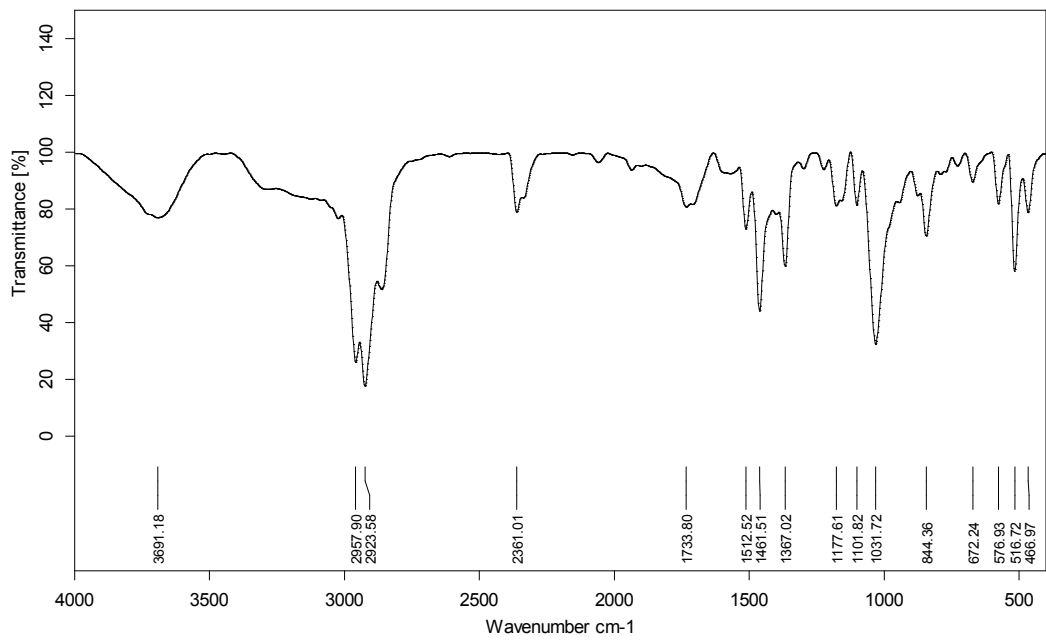

Figure S10. IR spectrum of *rac-1*

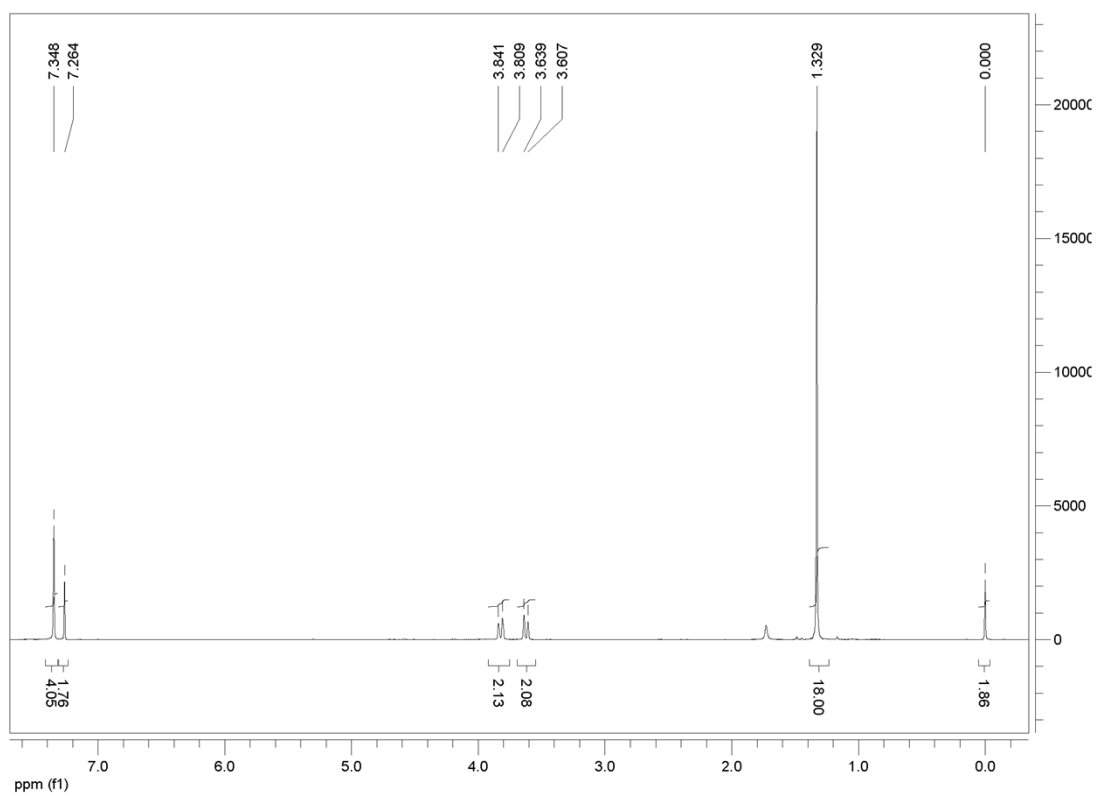

Figure S11.  $^1\text{H}$  NMR spectrum of *meso-1*

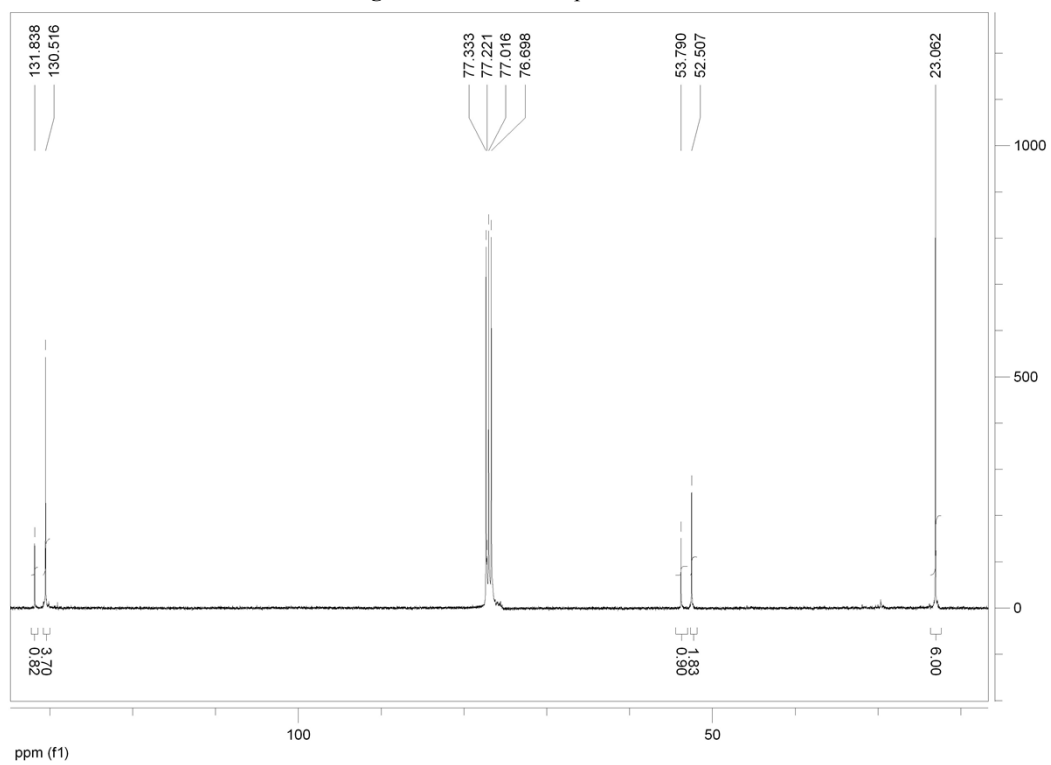

Figure S12.  $^{13}\text{C}$  NMR spectrum of *meso-1*



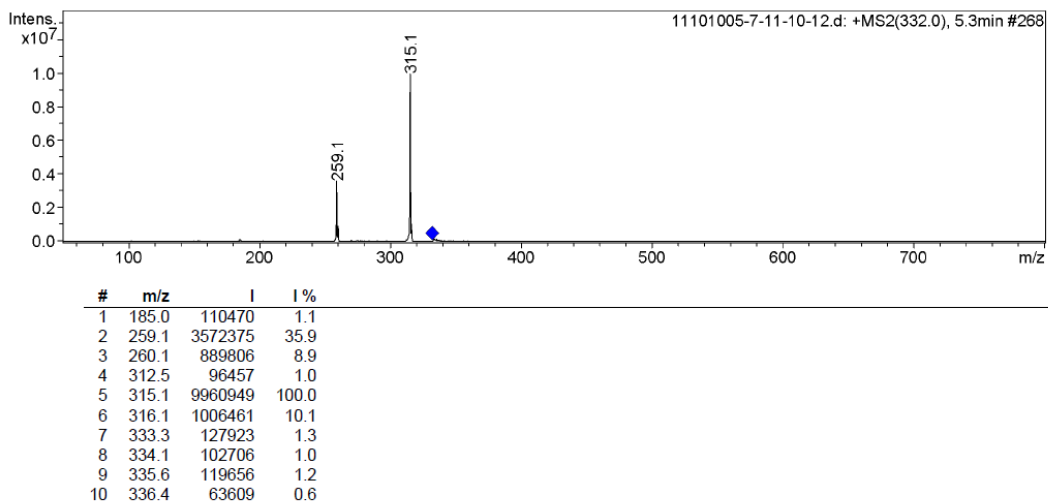

Figure S13. MS spectrum of *meso-1*

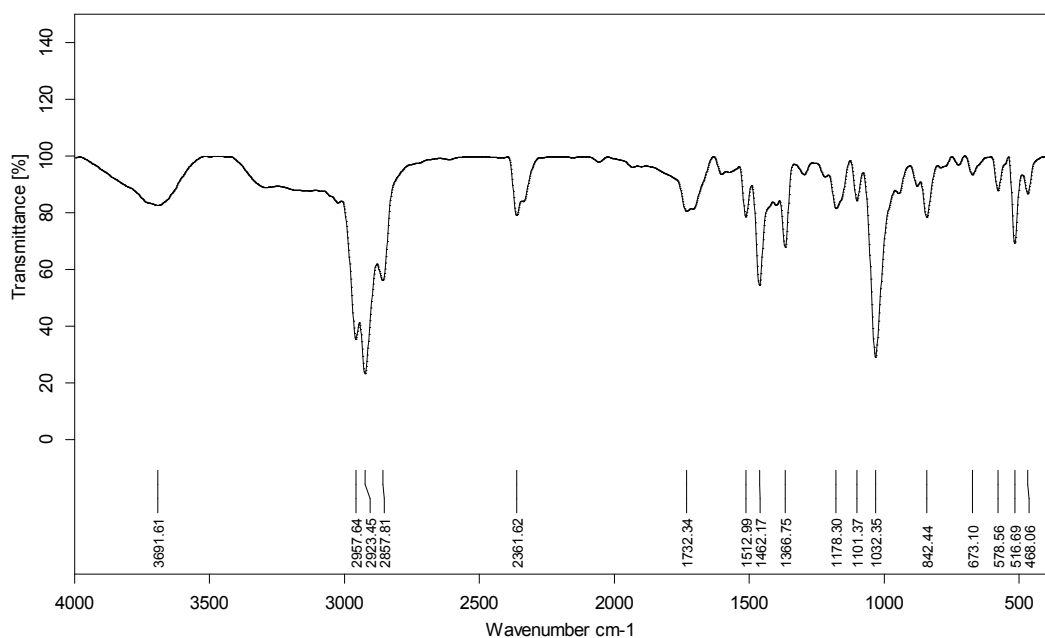

Figure S14. IR spectrum of *meso-1*

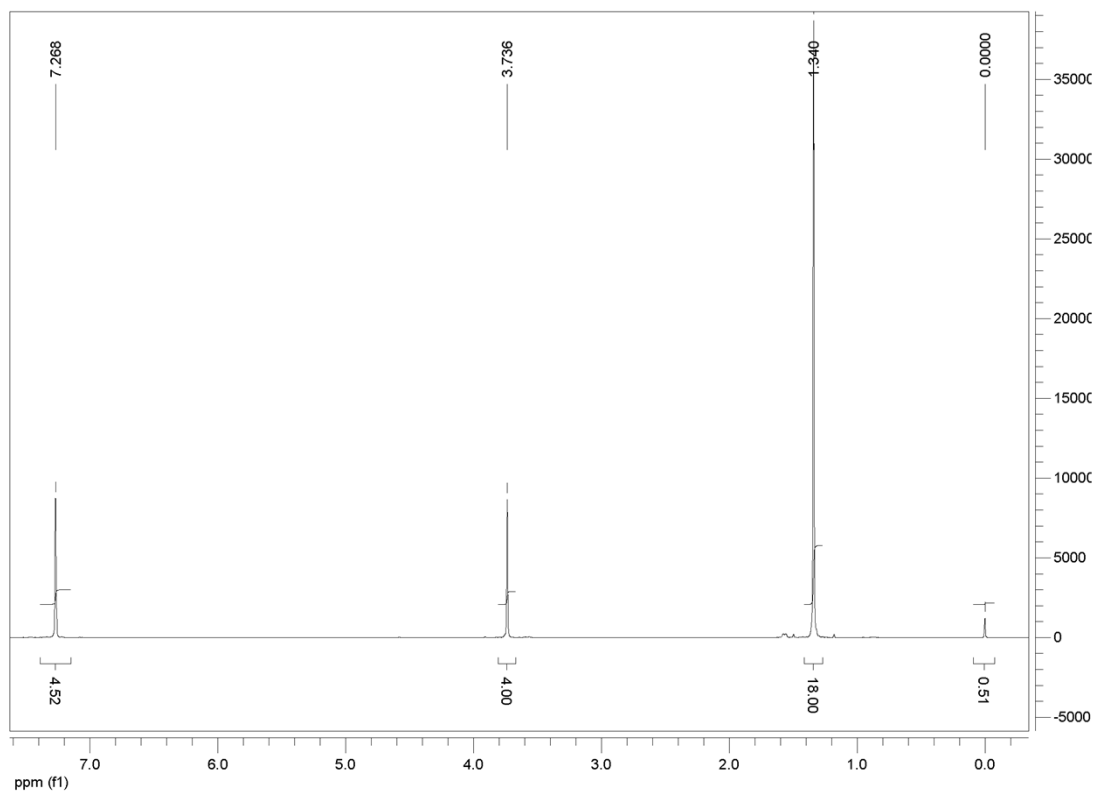

Figure S15.  $^1\text{H}$  NMR spectrum of **1s**

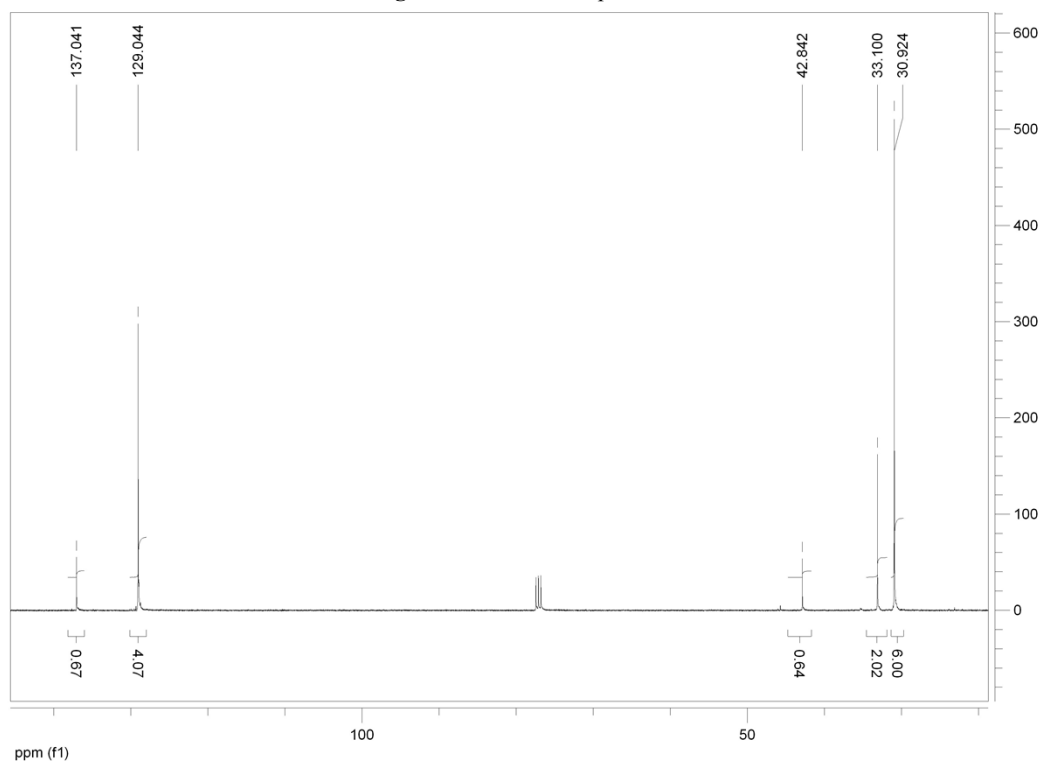

Figure S16.  $^{13}\text{C}$  NMR spectrum of **1s**

xzhg-2012-05-22-01 #6379 RT: 39.58 AV: 1 NL: 8.37E6  
F: + c Full ms [ 50.00-470.00]

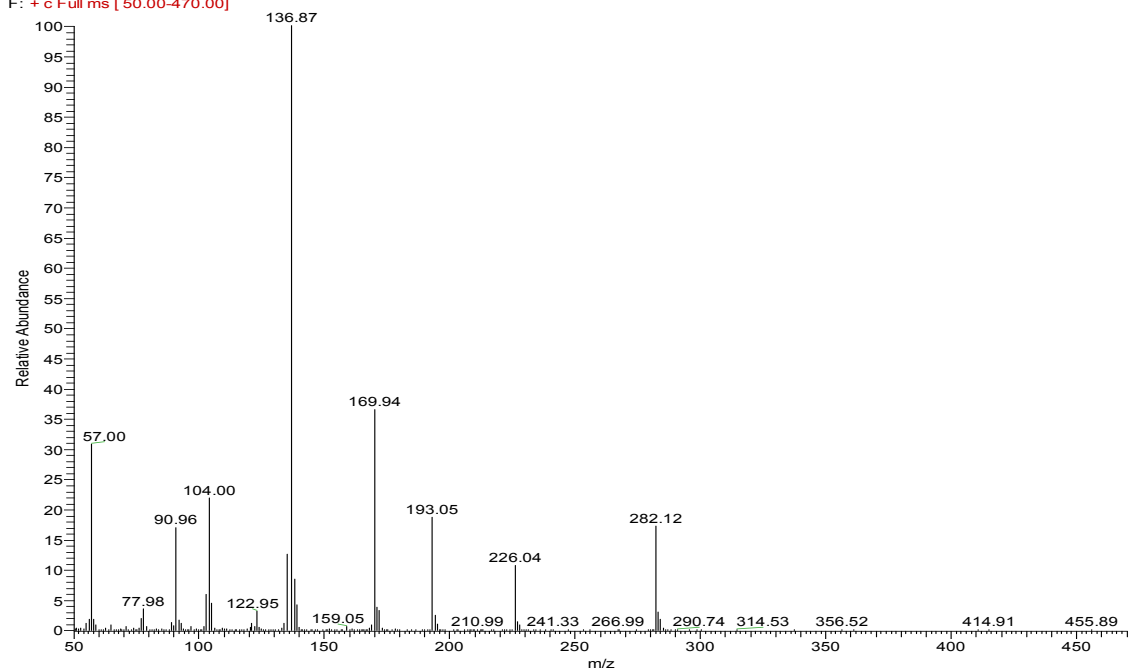

Figure S17. MS spectrum of 1s

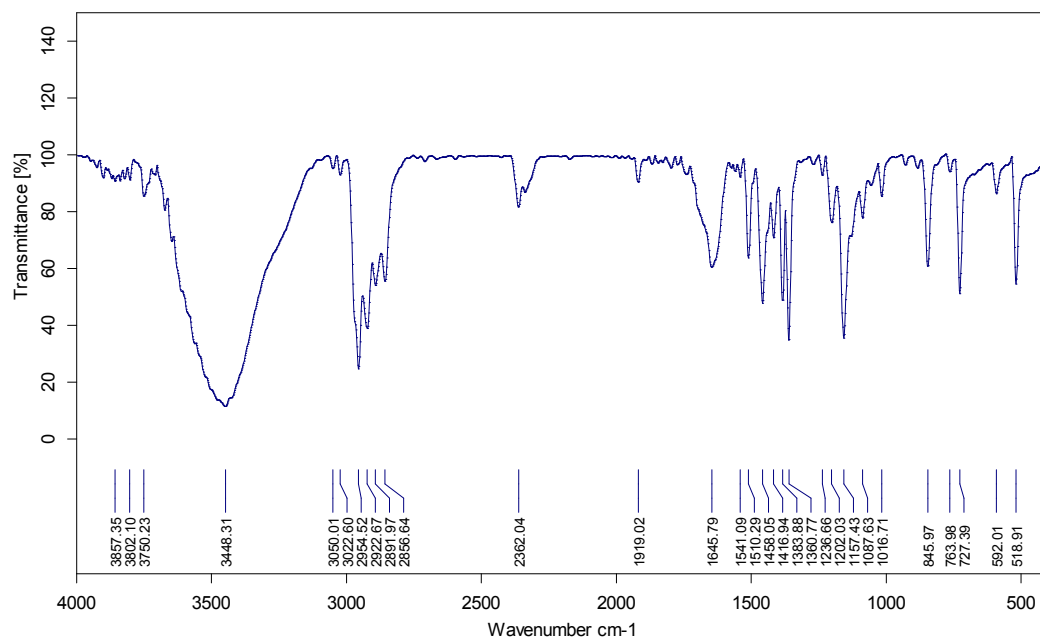

Figure S18. IR spectrum of 1s

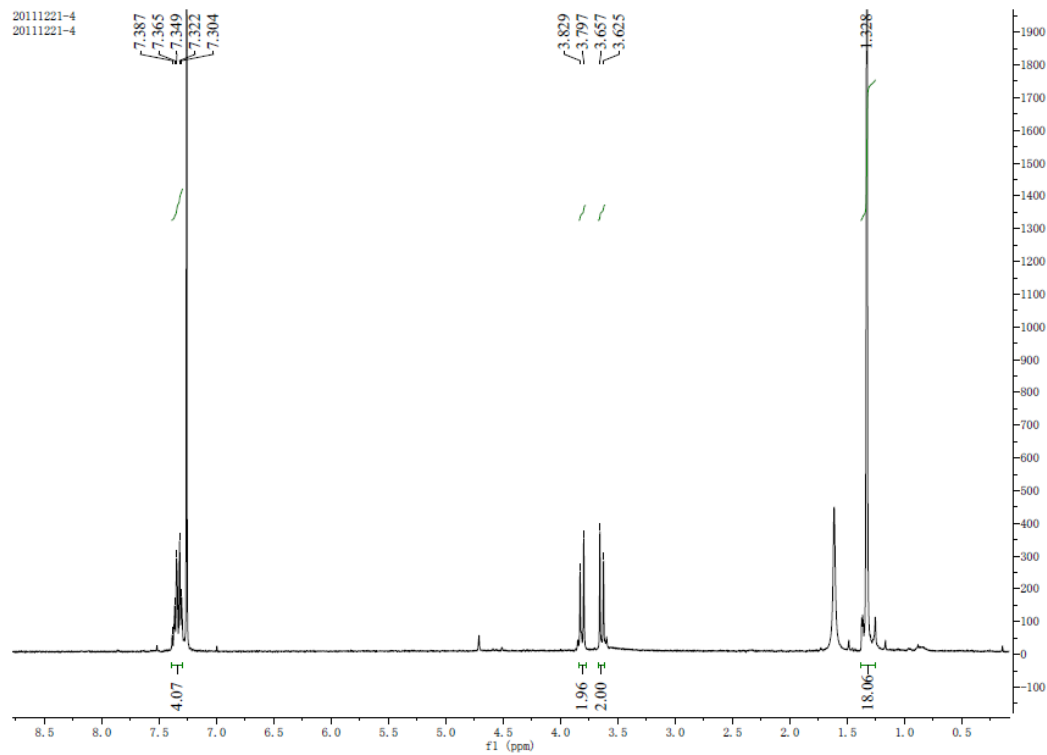

Figure S19.  $^1\text{H}$  NMR spectrum of *rac-2*

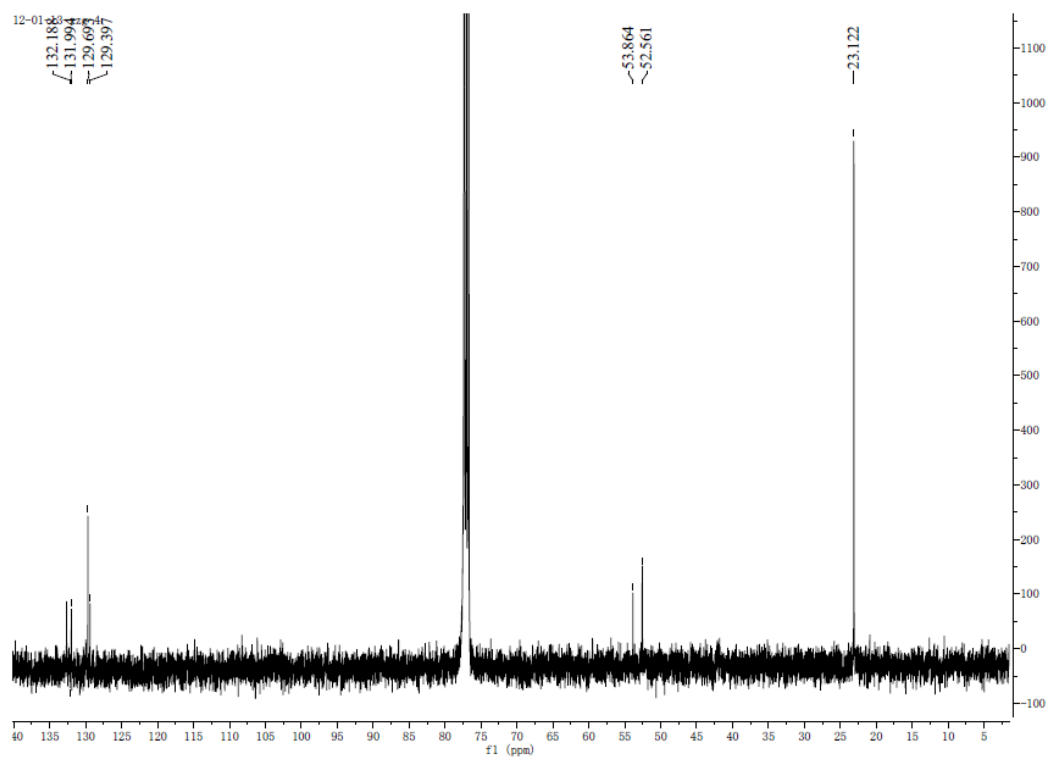

Figure S20.  $^{13}\text{C}$  NMR spectrum of *rac-2*

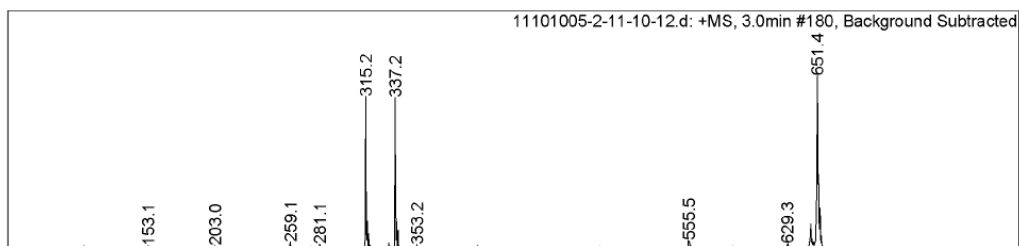

| #  | m/z   | I        | I %   |
|----|-------|----------|-------|
| 1  | 315.2 | 25199834 | 87.9  |
| 2  | 316.2 | 4497294  | 15.7  |
| 3  | 317.2 | 2402572  | 8.4   |
| 4  | 337.2 | 25004962 | 87.3  |
| 5  | 338.2 | 4401404  | 15.4  |
| 6  | 339.2 | 3051993  | 10.7  |
| 7  | 646.4 | 4072119  | 14.2  |
| 8  | 651.4 | 28652838 | 100.0 |
| 9  | 652.1 | 12261394 | 42.8  |
| 10 | 653.2 | 6669051  | 23.3  |

Figure S21. MS spectrum of *rac-2*

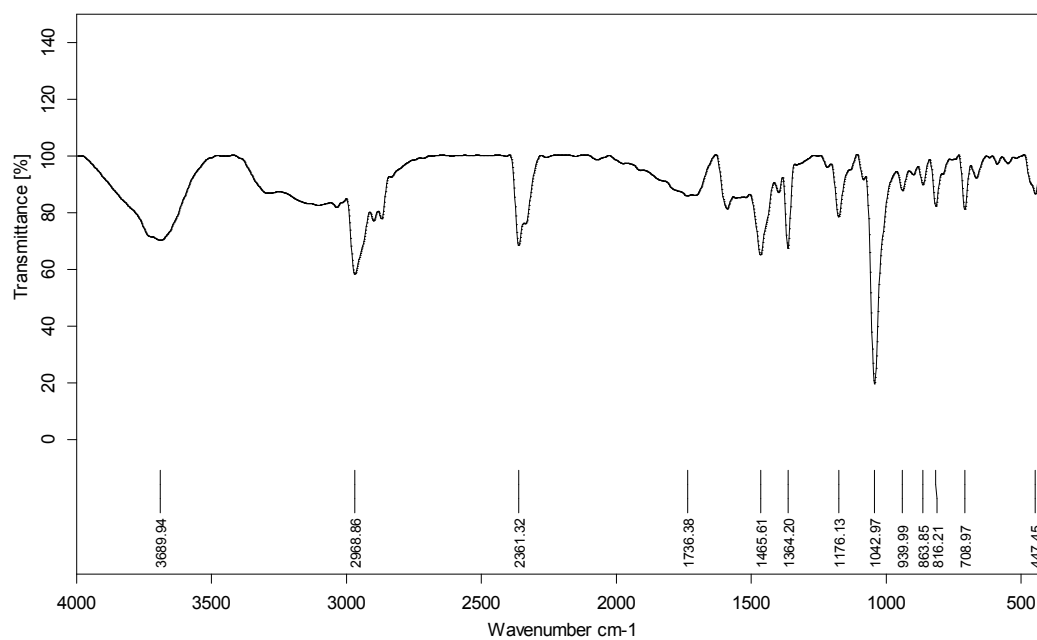

Figure S22. IR spectrum of *rac-2*

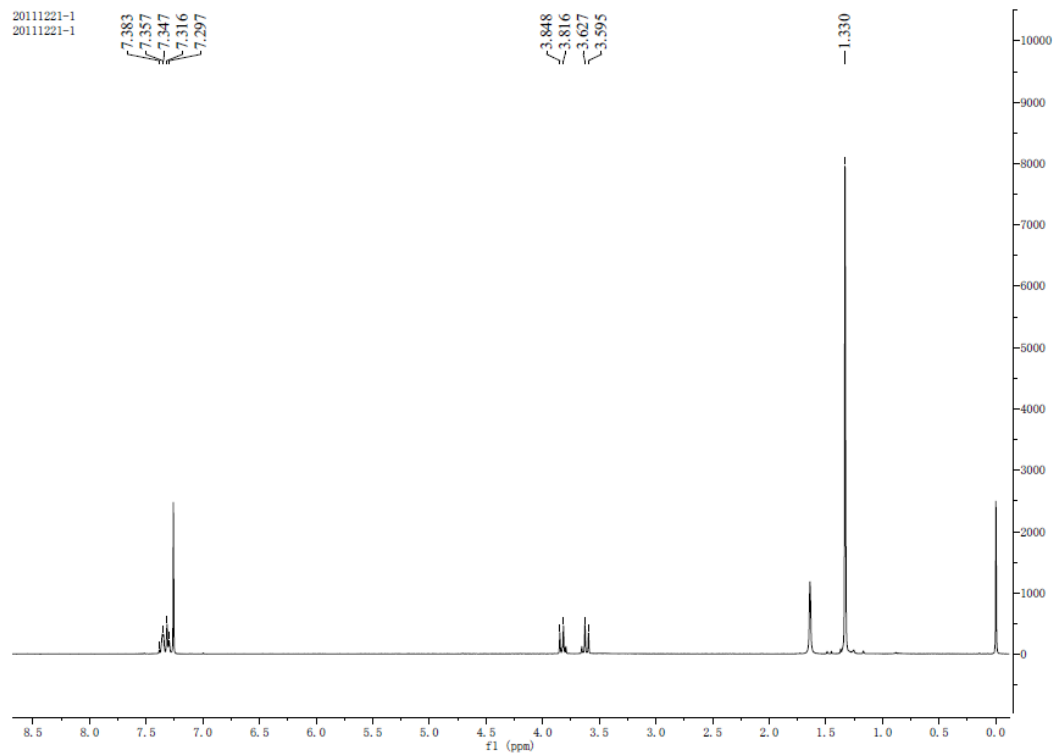

Figure S23.  $^1\text{H}$  NMR spectrum of *meso-2*

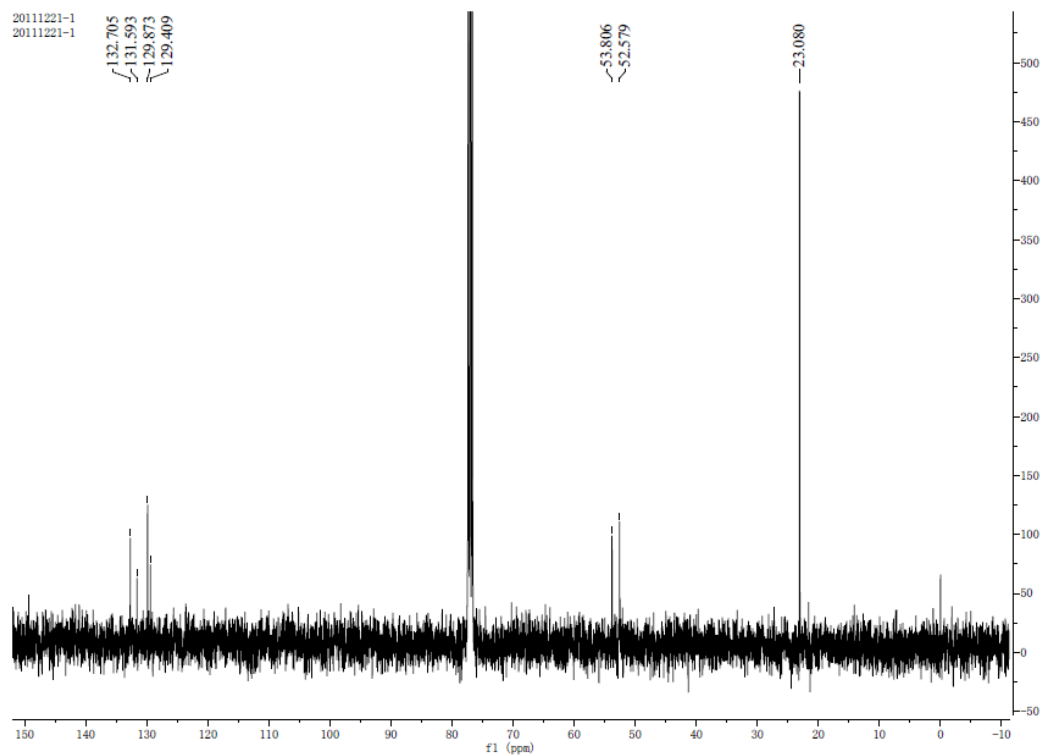

Figure S24.  $^{13}\text{C}$  NMR spectrum of *meso-2*

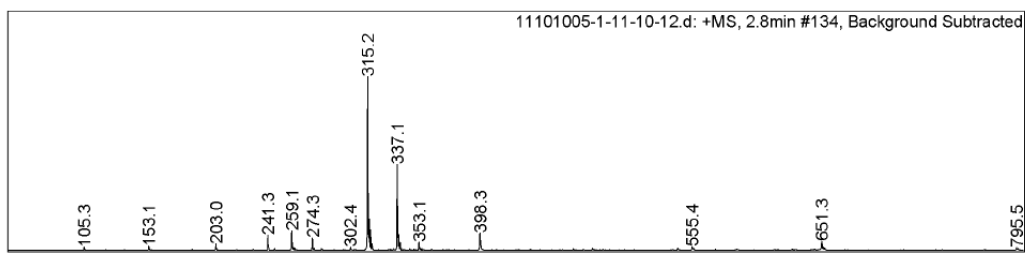

| #  | m/z   | I        | I%    |
|----|-------|----------|-------|
| 1  | 241.3 | 2849799  | 8.6   |
| 2  | 259.1 | 3678429  | 11.1  |
| 3  | 274.3 | 2379591  | 7.2   |
| 4  | 315.2 | 33252626 | 100.0 |
| 5  | 316.1 | 6019007  | 18.1  |
| 6  | 317.2 | 3877498  | 11.7  |
| 7  | 337.1 | 16356966 | 49.2  |
| 8  | 338.1 | 2935178  | 8.8   |
| 9  | 398.3 | 3256804  | 9.8   |
| 10 | 651.3 | 1721064  | 5.2   |

Figure S25. MS spectrum of *meso-2*

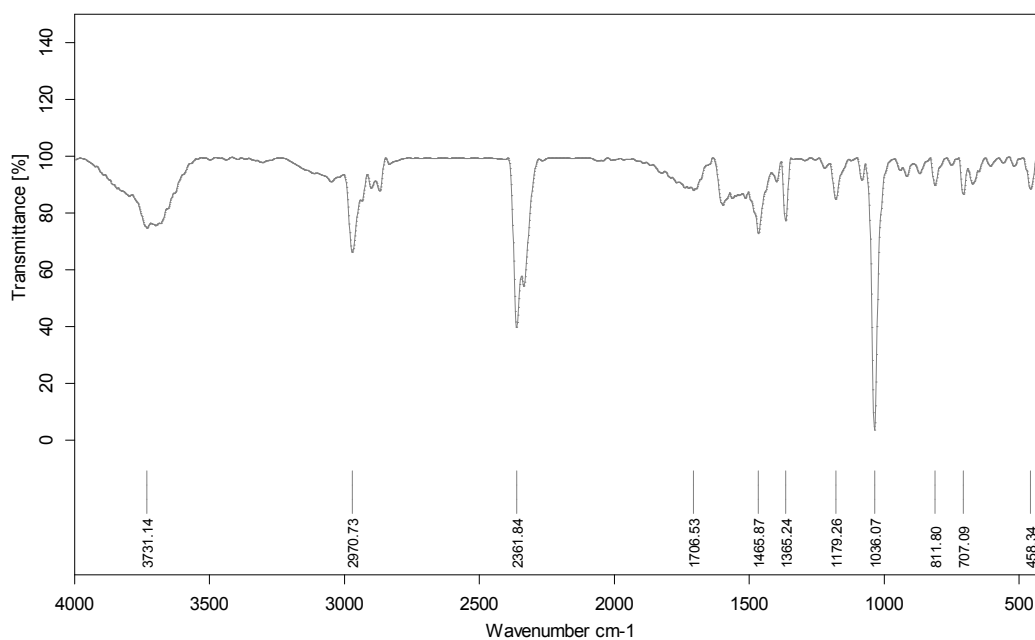

Figure S26. IR spectrum of *meso-2*

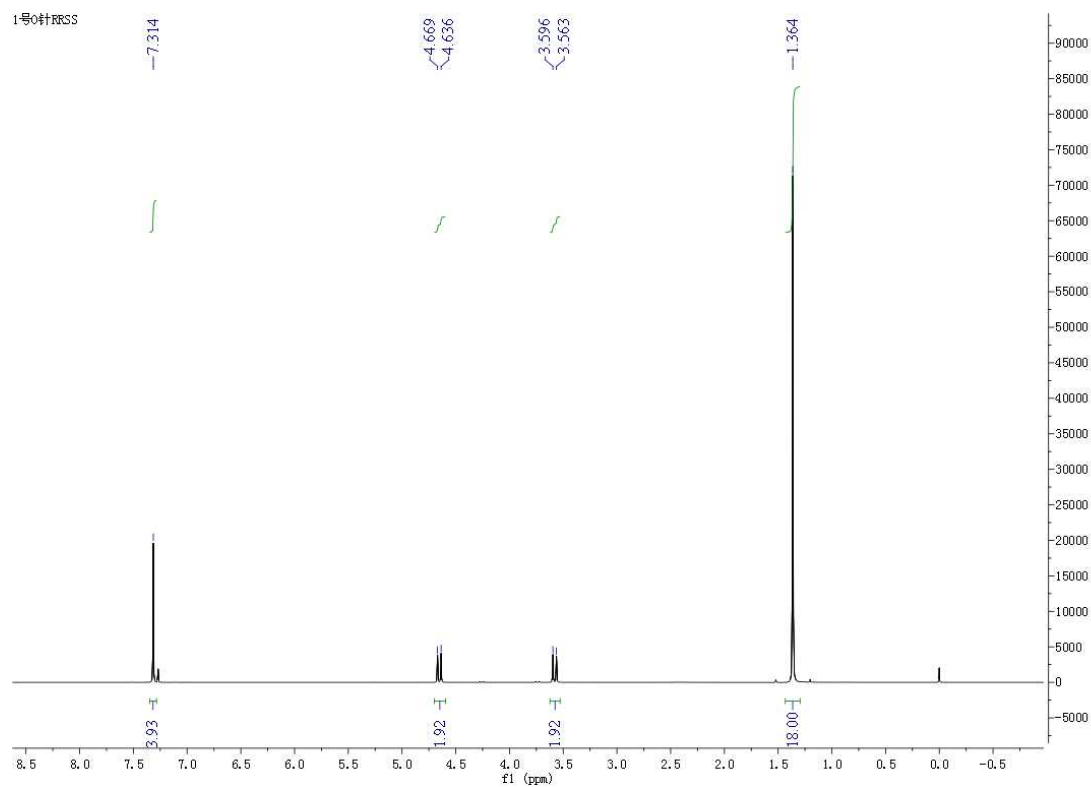

Figure S27. <sup>1</sup>H NMR spectrum of *rac-3*

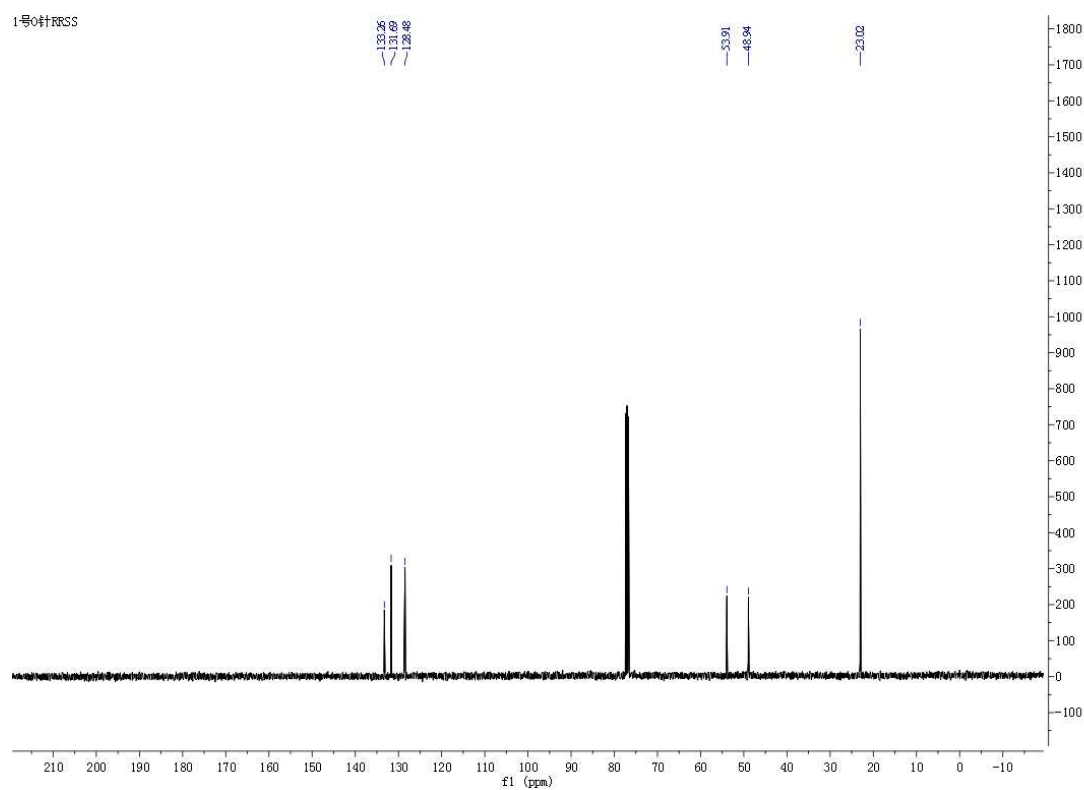

Figure S28. <sup>13</sup>C NMR spectrum of *rac-3*



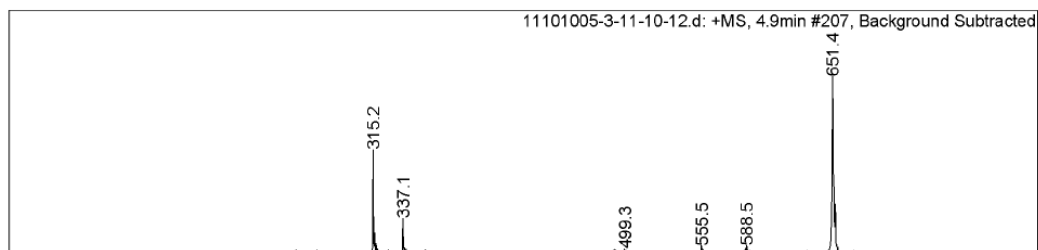

| #  | m/z   | I        | I%    |
|----|-------|----------|-------|
| 1  | 315.2 | 8986138  | 58.2  |
| 2  | 316.2 | 1686158  | 10.9  |
| 3  | 317.2 | 789808   | 5.1   |
| 4  | 337.1 | 2967648  | 19.2  |
| 5  | 555.5 | 553429   | 3.6   |
| 6  | 588.5 | 576898   | 3.7   |
| 7  | 651.4 | 15432092 | 100.0 |
| 8  | 653.1 | 4223690  | 27.4  |
| 9  | 654.3 | 688879   | 4.5   |
| 10 | 655.3 | 423072   | 2.7   |

Figure S29. MS spectrum of *rac-3*

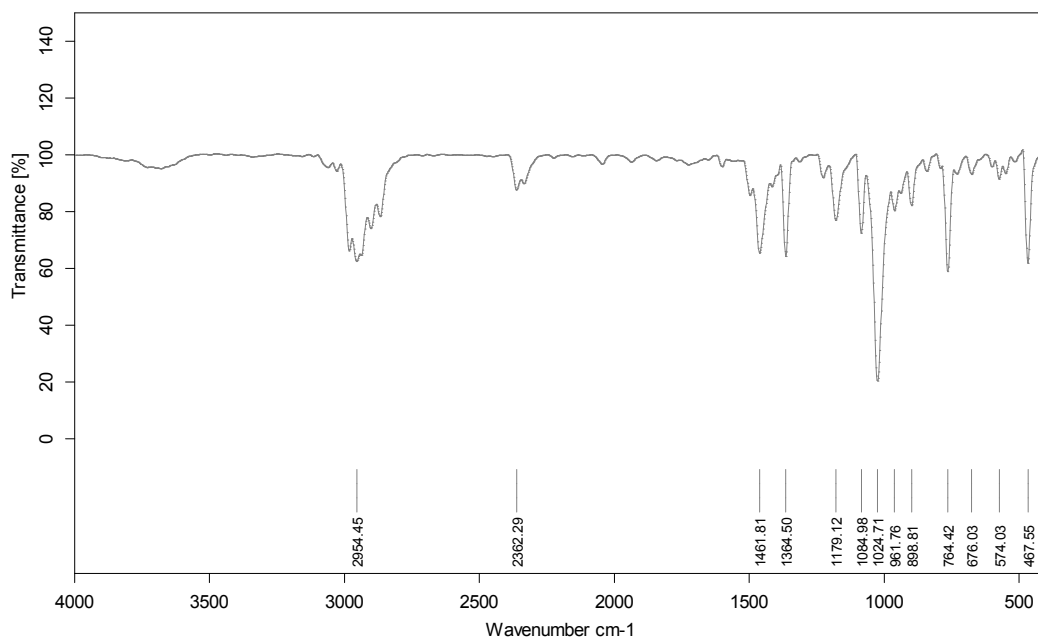

Figure S30. IR spectrum of *rac-3*

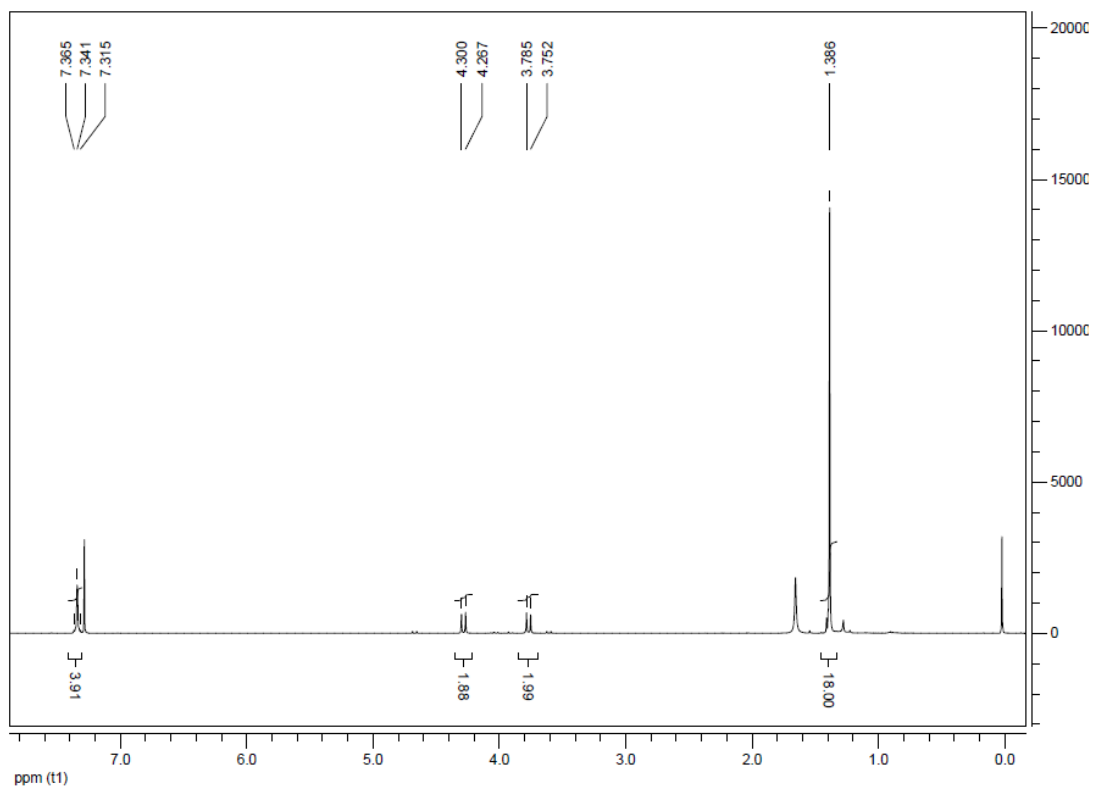

Figure S31.  $^1\text{H}$  NMR spectrum of  $(M/P,R,S)$ -3

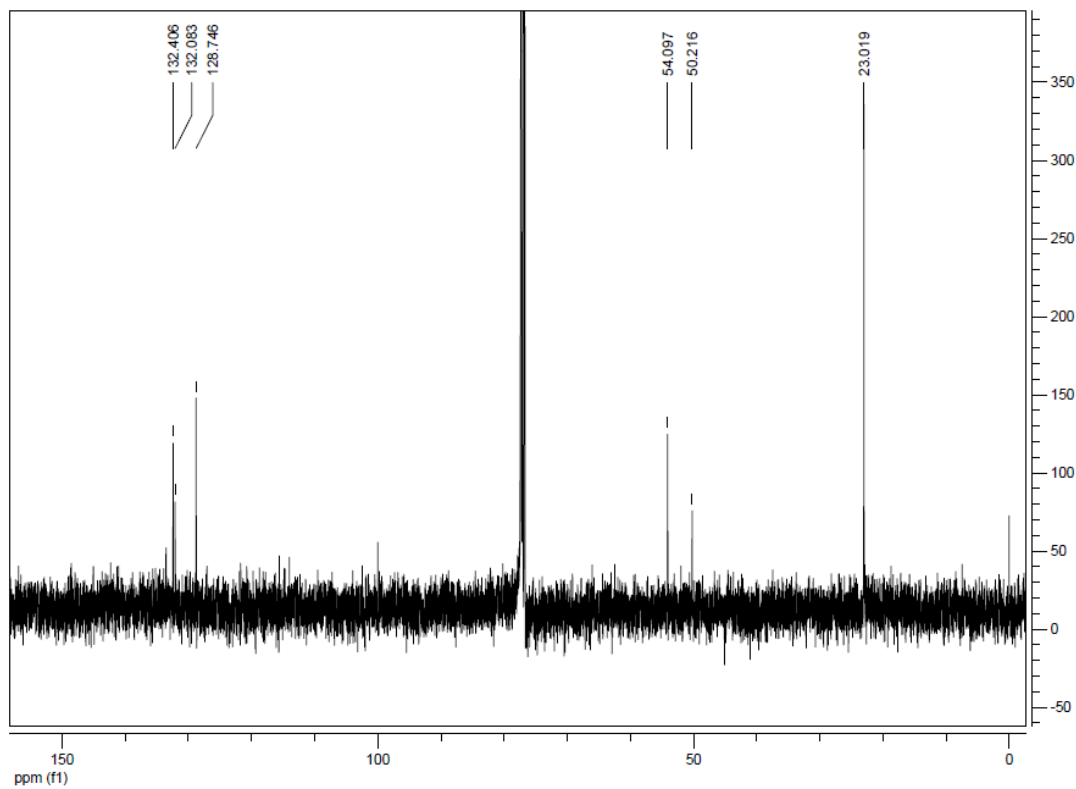

Figure S32.  $^{13}\text{C}$  NMR spectrum of  $(M/P,R,S)$ -3

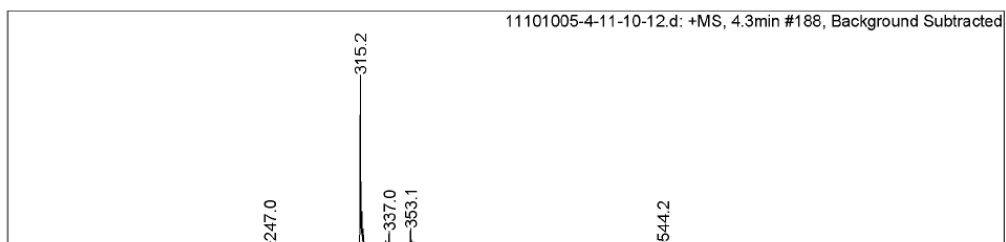

| #  | m/z   | I       | I%    |
|----|-------|---------|-------|
| 1  | 247.0 | 44190   | 1.9   |
| 2  | 315.2 | 2348817 | 100.0 |
| 3  | 316.1 | 459867  | 19.6  |
| 4  | 317.1 | 217648  | 9.3   |
| 5  | 334.3 | 57385   | 2.4   |
| 6  | 335.0 | 32243   | 1.4   |
| 7  | 337.0 | 186472  | 7.9   |
| 8  | 353.1 | 221248  | 9.4   |
| 9  | 354.2 | 36090   | 1.5   |
| 10 | 544.2 | 33434   | 1.4   |

Figure S33. MS spectrum of (M/P,R,S)-3

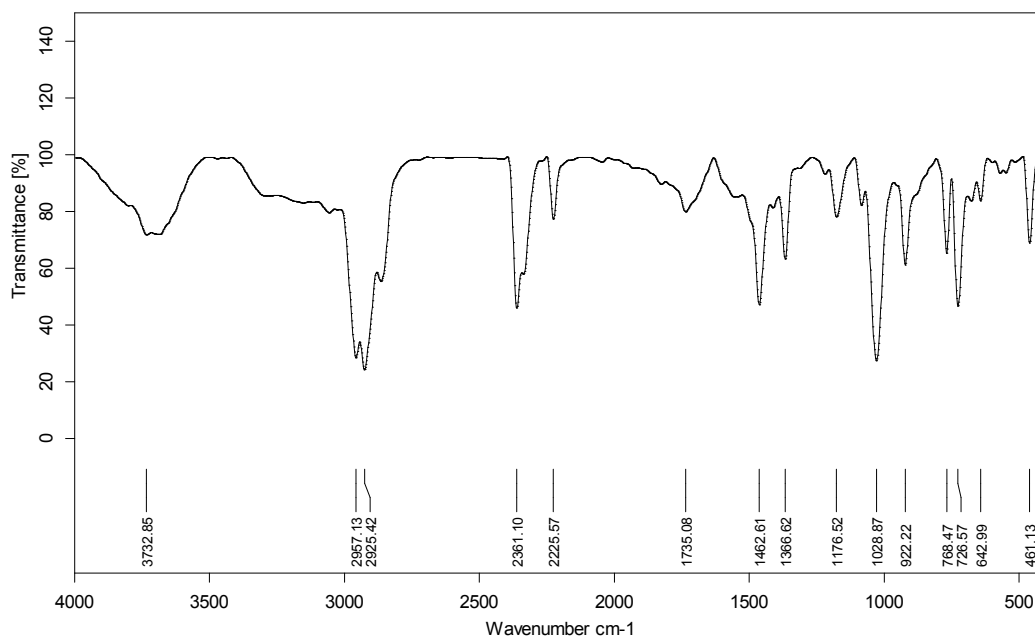

Figure S34. IR spectrum of (M/P,R,S)-3

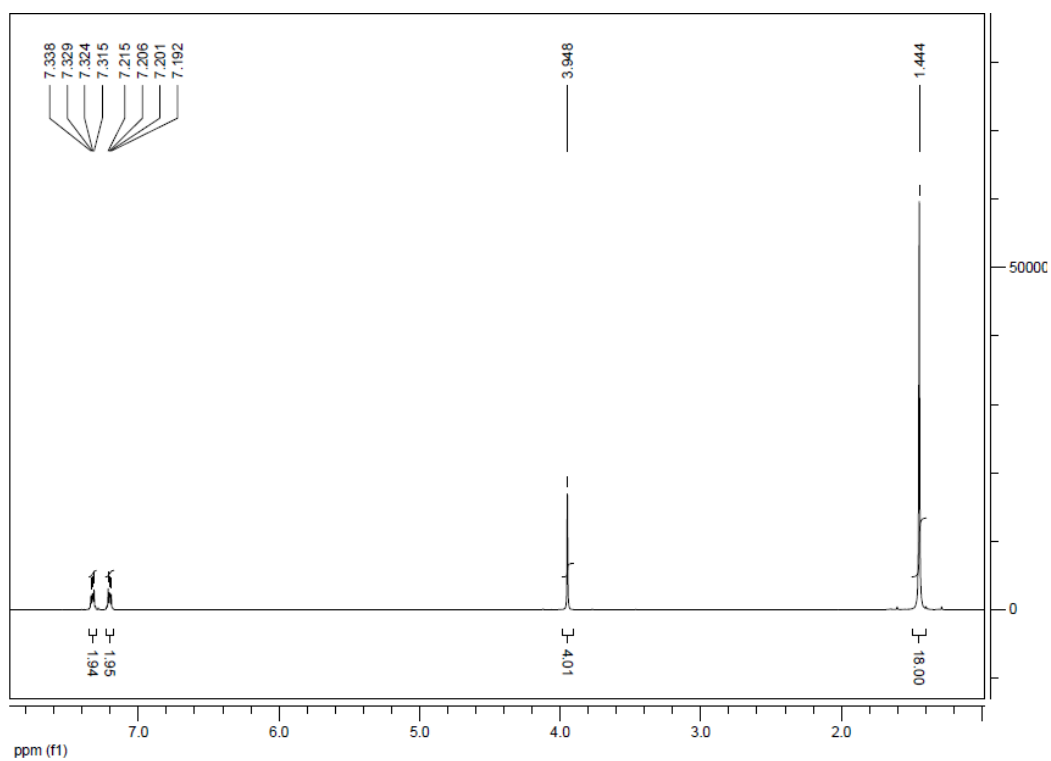

Figure S35. <sup>1</sup>H NMR spectrum of 3s

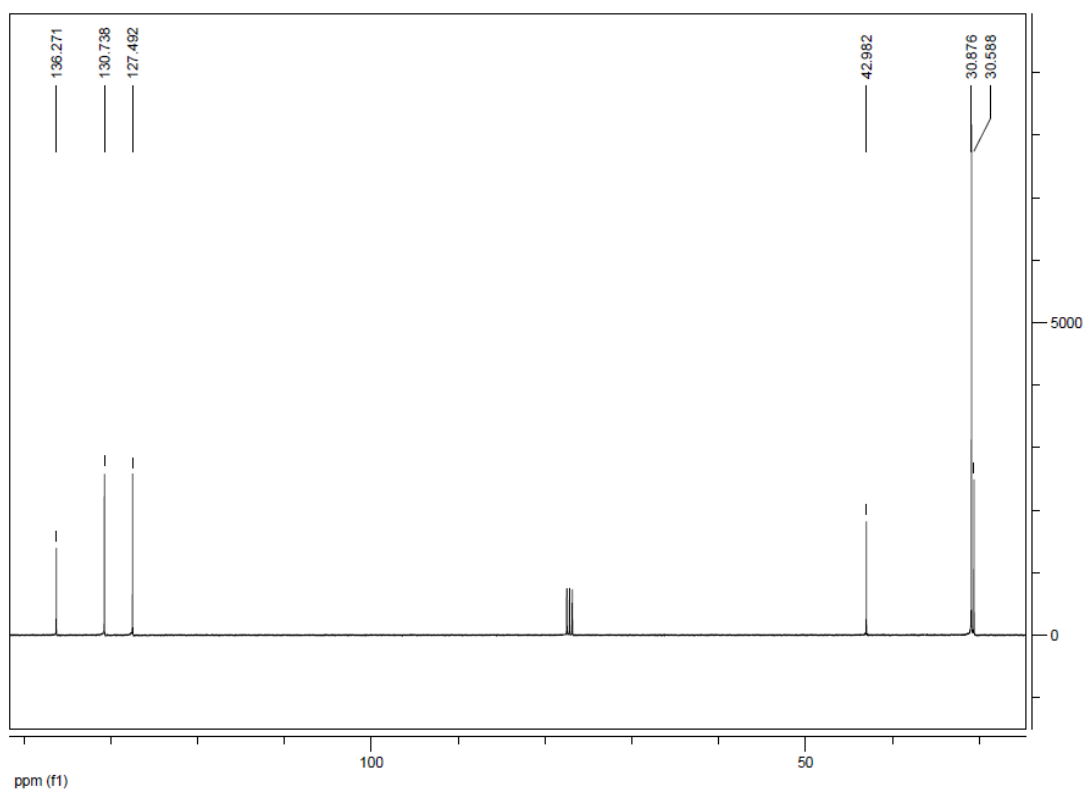

Figure S36. <sup>13</sup>C NMR spectrum of 3s

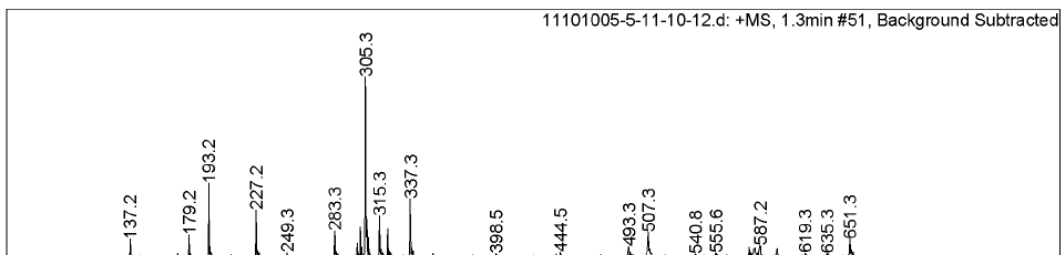

| #  | m/z   | I       | I%    |
|----|-------|---------|-------|
| 1  | 193.2 | 2751805 | 40.8  |
| 2  | 227.2 | 1755851 | 26.0  |
| 3  | 283.3 | 972744  | 14.4  |
| 4  | 301.5 | 1111028 | 16.5  |
| 5  | 305.3 | 6745774 | 100.0 |
| 6  | 306.2 | 1404620 | 20.8  |
| 7  | 315.3 | 1529572 | 22.7  |
| 8  | 321.2 | 1049527 | 15.6  |
| 9  | 337.3 | 2169698 | 32.2  |
| 10 | 507.3 | 905238  | 13.4  |

Figure S37. MS spectrum of 3s

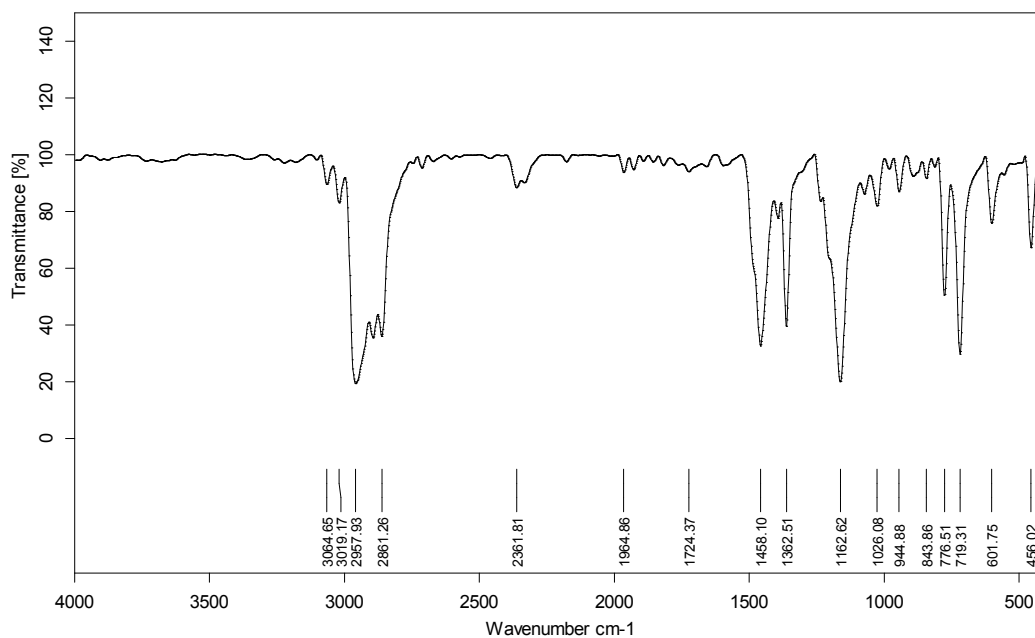

Figure S38. IR spectrum of 3s

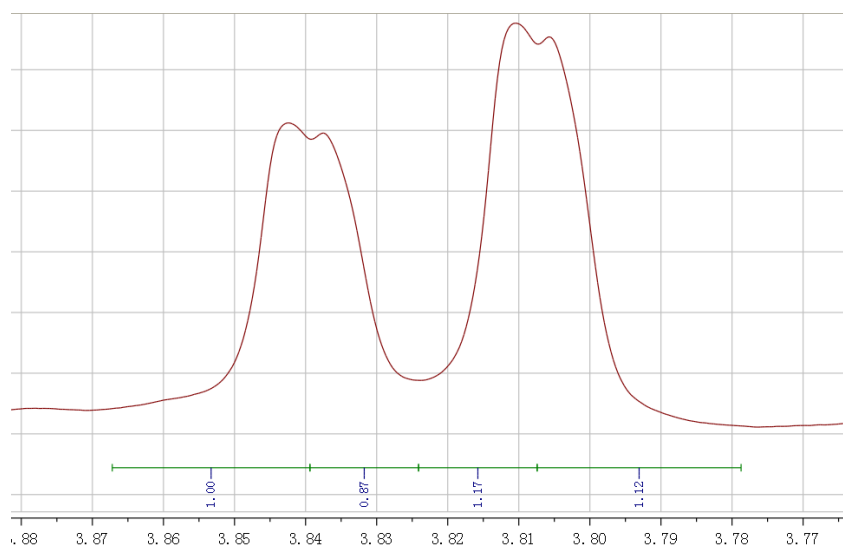

**Figure S39.**  $^1\text{H}$  NMR integral values for  $\text{CH}_2$  groups of **1** for calculating diastereomer ratios

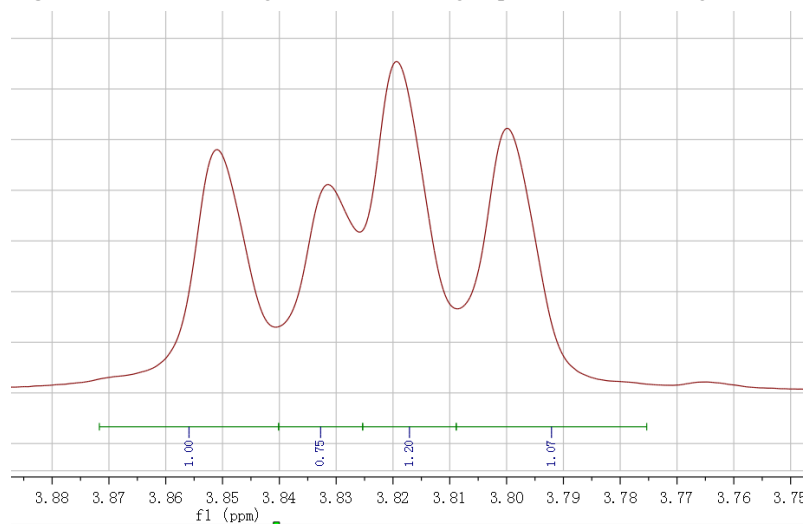

**Figure S40.**  $^1\text{H}$  NMR integral values for  $\text{CH}_2$  groups of **2** for calculating diastereomer ratios

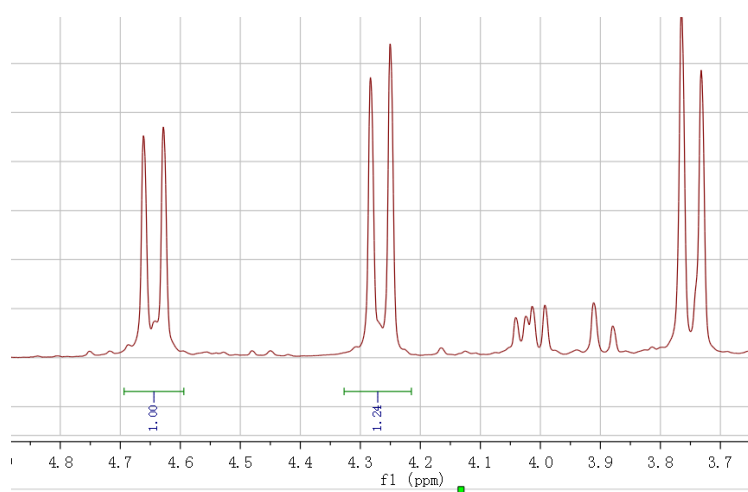

**Figure S41.**  $^1\text{H}$  NMR integral values for  $\text{CH}_2$  groups of **3** for calculating diastereomer ratios
